# Supplementary material
Source: MDPI journal article supplement (https://www.mdpi.com/2075-163X/14/2/187)
Supplement: s1 [file s1]

**Table S1.** Basic description of studied zircon samples.

| Sample No. | Localization                                   | Rock Description                                                              | Shape of the Zircon Grains, Inclusions                                            | Associated Minerals                                                                                                             |
|------------|------------------------------------------------|-------------------------------------------------------------------------------|-----------------------------------------------------------------------------------|---------------------------------------------------------------------------------------------------------------------------------|
| PHR-174    | Madeira pluton, outcrop                        | Albite granite, border facies, medium grained, dark brown-red colored         | euhedral crystals, inclusions of quartz,                                          | Albite, quartz, K-feldspar, Li-mica, Fe-oxide, fluorite, cassiterite, columbite, thorite, galena, pyrite, Ce-fluoride           |
| PHR-127    | Madeira pluton, outcrop                        | Albite granite, core facies, fluidal, medium grained, light gray in color     | subhedral grains, inclusions in galena                                            | Albite, K-feldspar, quartz, Li-mica, cryolite, aegirine, galena, sphalerite, pyrochlore, fluorite, xenotime, thorite, native Bi |
| PHR-163    | Madeira pluton, borehole 00/400W, depth 99.1 m | Albite granite, core facies, medium grained, gray                             | euhedral to subhedral grains, vacuolized cores, Hf-enriched rims,                 | Albite, quartz, K-feldspar, cryolite, Li-mica, aegirine, Fe-oxide, microlite, cassiterite, columbite, pyrochlore, thorite       |
| 4894       | Madeira pluton, outcrop                        | Albite granite, core facies, medium grained, dark gray, cryolite-rich         | euhedral to subhedral crystals, Hf-rich rims, inclusions of thorite and cryolite, | K-feldspar, quartz, albite, cryolite, Li-mica, aegirine, Fe-oxide, microlite, columbite, thorite                                |
| Iv-34      | Ivigtut, outcrop in the old open pit mine      | quartz- and sulphide-enriched pods in the cryolite body                       | subhedral to anhedral grains in carbonate                                         | siderite, calcite, quartz, columbite, sulfides and Sr,Th-phases                                                                 |
| Iv-56a     | Ivigtut, outcrop in the old open pit mine      | greisenized granite near contact with pegmatite                               | subhedral grains with inclusions of Sr,Th-carbonate                               | quartz, K-feldspar, Fe-oxides, cryolite, Sr,Th-carbonate, cassiterite, columbite, fluorite, chalcopryrite, galena, clay         |
| Iv-92      | Ivigtut, debris near the old mine              | quartz-feldspar layered dike with oriented texture                            | mm-sized zircon crystals growing perpendicularly to surface of K-feldspar layers  | quartz, K-feldspar, cryolite, xenotime, galena                                                                                  |
| Iv-X-3     | Ivigtut, outcrop in the old open pit mine      | fluorite-chalcedony metasomatite in granite                                   | euhedral to subhedral crystals in quartz                                          | quartz, chalcedony, fluorite, columbite, pyrite, xenotime, thorite                                                              |
| KB-2       | Khan Bogd, western body                        | coarse-grained peralkaline amphibole granite                                  | rounded admixtures in hematitized magnetite                                       | quartz, K-feldspar, plagioclase, hematite, Mn-carbonate, Na-amphibole, ilmenite, monazite                                       |
| KB-3       | Khan Bogd, western body                        | porphyritic coarse-grained peralkaline amphibole granite near western contact | small rounded grains and botryoidal                                               | quartz, K-feldspar, plagioclase, Na-amphibole, chlorite, remnants of altered Zr-silicates, apatite                              |

|          |                                                |                                                                                                       |                                                                                             |                                                                                                                                          |
|----------|------------------------------------------------|-------------------------------------------------------------------------------------------------------|---------------------------------------------------------------------------------------------|------------------------------------------------------------------------------------------------------------------------------------------|
| KB-4     | Khan Bogd, western body                        | porphyritic coarse-grained peralkaline amphibole granite near western contact, strongly metasomatized | anhedral grains and botryoidal aggregates, rounded admixtures in hematitized magnetite      | quartz, K-feldspar, plagioclase, Na-amphibole, magnetite, altered Zr-silikates, monazite, bastnasite                                     |
| KB-6     | Khan Bogd, roof zone of the western body       | pealkaline aplite/ pegmatite                                                                          | late veinlets of zircon-xenotime solid solutions in relicts of primary Zr-silikates         | quartz, plagioclase, Na-amphibole, relicts of Na,Ca-zirconosilicate, calciocatapleite, calcite, bastnasite, xenotime                     |
| KB-13    | Khan Bogd, roof zone of the western body       | peralkaline granite porphyry                                                                          | rounded sun-like shaped aggregates in association with Na-pyroxene                          | quartz, alkalifeldspar, Na-pyroxene, titanite, monazite, bastnasite                                                                      |
| EDG09    | Khan Bogd, roof zone of the western body       | dike of porphyritic peralkaline Px-granite                                                            | rounded grains with Hf-enriched rims                                                        | quartz, perthite, Na-pyroxene, rutile, bastnasite, Fe-oxide                                                                              |
| KhaBur2  | Khalzan Buregte, outcrop, older suite, phase 2 | medium-grained peralkaline pyroxene syenite                                                           | radial zircon aggregates, Zr, SiP,As,LREE transitional phases in association with           | plagioclase, K-feldspar, Na-pyroxene, relicts of NaZr- and BaZr-silikates, xenotime, chernovite                                          |
| KhaBur3  | Khalzan Buregte, outcoop, older suite, phase 2 | coarse-grained peralkaline quartz-rich pyroxene granite                                               | botryoidal aggregates                                                                       | quartz, plagioclase, K-feldspar, Na-pyroxene, chalcoppyrite, Pb-teluride                                                                 |
| KhaBur4  | Khalzan Buregte, outcrop, older suite, phase 2 | coarse-grained peralkaline quartz-rich pyroxene granite                                               | anhedral grains in relicts of primary Zr,Na-silicate                                        | quartz, plagioclase, K-feldspar, Na-pyroxene, 3-5mm sized relicts of Zr.-silicates, clay minerals, YCa-silicate                          |
| KhaBur6  | Khalzan Buregte, outcrop, older suite, phase 3 | fine-grained layered pyroxene-rich peralkaline syenite                                                | altered subhedral grains, botryoidal aggregates                                             | plagioclase, K-feldspar, quartz, Na-pyroxene, titanite, rutile,                                                                          |
| KhaBur7  | Khalzan Buregte, outcrop, older suite, phase 3 | fine-grained layered amphibole-rich peralkaline syenite                                               | small anhedral grains in amphibole matrix among albite crystals                             | plagioclase, Na-amphibole, K-feldspar, monazite                                                                                          |
| KhaBur8  | Khalzan Buregte, outcrop, older suite, phase 3 | amphibole-rich peralkaline syenite                                                                    | small grains in Qtz-Ab matrix among Na-pyroxene crystals, scarce larger subhedral crystals  | K-feldspar, plagioclase, quartz, amphibole, biotite, apatite, monazite, xenotime,                                                        |
| KhaBur14 | Khalzan Buregte, outcrop, older suite, phase 4 | red medium-grained quartz peralkaline amphibole                                                       | anhedral grains associated with Fe-oxides and REE-carbonates                                | K-feldspar, plagioclase, amphibole, quartz, calcite, REE-carbonates, Fe-oxide                                                            |
| KhaBur13 | Khalzan Buregte, outcrop, older suite, phase 5 | dark fine-grained apmhibole-rich peralkaline syenite                                                  | secondary anhedral zircon associated with As,P,REE-phases in relicts of primary Zr-silicate | K-feldspar, albite, Na-pyroxene, quartz, monazite, chernovite, relicts of zirconosilikates (?) transformed to clay and Al,Ca-rich zircon |
| KhaBur9  | Khalzan Buregte, outcrop, older suite,         | layered pealkaline granite with red K-feldspar                                                        | subhedral grains associated with thorite                                                    | quartz, K-feldspar, albite, rare Fe-mica, cassiterite,                                                                                   |

|          | phase 7                                          |                                                                                          | and Fe-oxides                                               | thorite, rutile, columbite, fluorite,                                       |
|----------|--------------------------------------------------|------------------------------------------------------------------------------------------|-------------------------------------------------------------|-----------------------------------------------------------------------------|
| KhaBur10 | Khalzan Buregte, outcrop, younger suite, phase 7 | amazonite pegmatite                                                                      | euhedral crystals with Hf-rich rims associated with thorite | quartz, perthitic alkalifeldspar, albite, rare Fe-mica, columbite, thorite  |
| KhaBur11 | Khalzan Buregte, outcrop, younger suite, phase 7 | medium-grained peralkaline amazonite granite with rounded quartz and miarolytic cavities | subhedral crystals with vacuolized cores                    | quartz, perthitic alkalifeldspar, albite, rare Fe-mica, fluorite, microlite |

Table S2. Important geochemical values.

| Reservoir                                                                  | Chondrite C1 | Primitive Mantle | Silicate Earth | Bulk Continental Crust | Lower Continental Crust | Middle Continental Crust | Upper Continental Crust |
|----------------------------------------------------------------------------|--------------|------------------|----------------|------------------------|-------------------------|--------------------------|-------------------------|
| Author                                                                     | McDonough    | Lyuyetskaya      | McDonough      | Rudnick+Gao            | Rudnick+Gao             | Rudnick+Gao              | Rudnick+Gao             |
| Zr (ppm)                                                                   | 3.82         | 8.42             | 10.5           | 132                    | 68                      | 149                      | 193                     |
| Hf (ppm)                                                                   | 0.103        | 0.227            | 0.283          | 3.7                    | 1.9                     | 4.4                      | 5.3                     |
| Nb (ppm)                                                                   | 0.24         | 0.46             | 0.658          | 8                      | 5                       | 10                       | 12                      |
| Ta (ppm)                                                                   | 0.014        | 0.03             | 0.037          | 0.7                    | 0.6                     | 0.6                      | 0.9                     |
| Y (ppm)                                                                    | 1.57         | 3.37             | 4.3            | 19                     | 16                      | 20                       | 21                      |
| Yb (ppm)                                                                   | 0.161        | 0.346            | 0.441          | 1.9                    | 1.5                     | 2.2                      | 2                       |
| Zr/Hf (ppm/ppm)                                                            | 37.1         | 37.1             | 37.1           | 35.7                   | 35.8                    | 33.9                     | 36.4                    |
| Nb/Ta (ppm/ppm)                                                            | 17.1         | 15.3             | 17.8           | 11.4                   | 8.3                     | 16.7                     | 13.3                    |
| Y/Yb (ppm/ppm)                                                             | 9.8          | 9.7              | 9.8            | 10.0                   | 10.7                    | 9.1                      | 10.5                    |
| ZrO <sub>2</sub> /HfO <sub>2</sub> (by weight)                             | 42.5         | 42.5             | 42.5           | 40.9                   | 41.0                    | 38.8                     | 41.7                    |
| Nb <sub>2</sub> O <sub>5</sub> /Ta <sub>2</sub> O <sub>5</sub> (by weight) | 20.1         | 18.0             | 20.8           | 13.4                   | 9.8                     | 19.5                     | 15.6                    |
| Y <sub>2</sub> O <sub>3</sub> /Yb <sub>2</sub> O <sub>3</sub> (by weight)  | 10.9         | 10.9             | 10.9           | 11.2                   | 11.9                    | 10.1                     | 11.7                    |
| Zr/Hf atomic                                                               | 72.6         | 72.6             | 72.6           | 69.8                   | 70.0                    | 66.3                     | 71.3                    |
| Nb/Ta atomic                                                               | 33.4         | 29.9             | 34.6           | 22.3                   | 16.2                    | 32.5                     | 26.0                    |
| Y/Yb atomic                                                                | 19.0         | 19.0             | 19.0           | 19.5                   | 20.8                    | 17.7                     | 20.4                    |
